# Supplementary material
Source: PubMed Central journal article supplement (PMC3063997)
Supplement: NIHMS279547-supplement-supplement_1.pdf [file NIHMS279547-supplement-supplement_1.pdf]

## Supplementary Table 1: Information on Ancestry-Informative SNP Markers

### Genotyped in the Study

| SNP number | dbSNP ID   | Chromosomal location | Location within the gene | ABI SNP assay ID |
|------------|------------|----------------------|--------------------------|------------------|
| 1          | rs4915286  | 1q31.3d              | Intergenic/Unknown       | C_27874730_10    |
| 2          | rs1678986  | 15q15.1d             | Intron                   | C_8794019_10     |
| 3          | rs7189406  | 16p13.13c            | Intron                   | C_28960853_10    |
| 4          | rs3017626  | 1p13.2d              | Intergenic/Unknown       | C_1514018_10     |
| 5          | rs6945924  | 7q35a                | Intergenic/Unknown       | C_462824_10      |
| 6          | rs10508349 | 10p14d               | Intergenic/Unknown       | C_29964593_20    |
| 7          | rs11038170 | 11p11.2d             | Intergenic/Unknown       | C_30978686_10    |
| 8          | rs7012587  | 8q24.21c             | Intergenic/Unknown       | C_3220236_10     |
| 9          | rs11075598 | 16q21e               | Intergenic/Unknown       | C_30931152_10    |
| 10         | rs2467864  | 15q21.1a             | Intergenic/Unknown       | C_26909607_10    |
| 11         | rs973786   | 4p14d                | Intergenic/Unknown       | C_8873675_10     |
| 12         | rs12637719 | 3p12.1b              | Intergenic/Unknown       | C_11900268_10    |
| 13         | rs12547628 | 8p22e                | Intergenic/Unknown       | C_313011_10      |
| 14         | rs9937557  | 16p13.2c             | Intergenic/Unknown       | C_29902882_10    |
| 15         | rs4908736  | 1p36.23b             | Intergenic/Unknown       | C_30143720_10    |
| 16         | rs1289174  | 5q21.2a              | Intergenic/Unknown       | C_8877855_10     |
| 17         | rs17649077 | 15q26.1e             | Intergenic/Unknown       | C_33497965_10    |
| 18         | rs9415639  | 10q21.2b             | Intergenic/Unknown       | C_29498011_10    |
| 19         | rs1549152  | 5q34g                | Intron                   | C_1987441_20     |
| 20         | rs868767   | 3q23c                | Intergenic/Unknown       | C_11800103_10    |
| 21         | rs10272083 | 7q35a                | Intron                   | C_2965411_10     |
| 22         | rs2317212  | 3q11.2c              | Intergenic/Unknown       | C_16193231_10    |
| 23         | rs1557553  | 22q13.31a            | Intergenic/Unknown       | C_8815305_10     |
| 24         | rs17066390 | 4q34.3b              | Intergenic/Unknown       | C_34667822_10    |

Abbreviations: SNP, single nucleotide polymorphism; ABI, Applied Biosystems (Foster City, CA).
